# Supplementary material for: Functional connectivity in ADHD children doing Go/No-Go tasks: An fMRI systematic review and meta-analysis
Source: PubMed Central journal article supplement (PMC10896184; doi:10.1515/tnsci-2022-0299), 2023-12-31
Supplement: tnsci-2022-0299-sm.pdf [file tnsci-2022-0299-sm.pdf]

# Supplementary material

**Table S1:** Summary of all 14 studies with MNI coordinates use to generate ALE

| Study              | Task                                                                                                                                                                                                                                                         | No. of subjects |          | Coordinates |     |     |          |                 |     |     |                 |    |    |
|--------------------|--------------------------------------------------------------------------------------------------------------------------------------------------------------------------------------------------------------------------------------------------------------|-----------------|----------|-------------|-----|-----|----------|-----------------|-----|-----|-----------------|----|----|
|                    |                                                                                                                                                                                                                                                              | ADHD            | Controls | ADHD        |     |     | Controls |                 |     |     |                 |    |    |
| Booth et al., 2005 | Subjects provided with one of three stimuli: red triangle (target stimuli), red trapezoid (distractor) and blue triangle (distractor). Subjects were instructed to button press with their fingers when presented with target stimuli and withhold otherwise | 12              | 12       | 42          | 9   | 15  | 3        | 18              | 54  |     |                 |    |    |
|                    |                                                                                                                                                                                                                                                              |                 |          | -24         | -51 | 51  | 15       | 57              | 21  |     |                 |    |    |
|                    |                                                                                                                                                                                                                                                              |                 |          | 30          | -60 | 3   | 27       | 0               | 42  |     |                 |    |    |
|                    |                                                                                                                                                                                                                                                              |                 |          | 21          | -60 | 48  | 42       | 24              | 15  |     |                 |    |    |
|                    |                                                                                                                                                                                                                                                              |                 |          | -3          | -15 | -21 | -30      | 27              | -12 |     |                 |    |    |
|                    |                                                                                                                                                                                                                                                              |                 |          | -33         | 30  | 6   | 48       | -3              | 27  |     |                 |    |    |
|                    |                                                                                                                                                                                                                                                              |                 |          | -39         | -48 | 3   | -42      | 0               | 33  |     |                 |    |    |
|                    |                                                                                                                                                                                                                                                              |                 |          | 48          | -9  | -24 | -12      | -3              | 18  |     |                 |    |    |
|                    |                                                                                                                                                                                                                                                              |                 |          |             |     |     |          | -42             | -30 | 0   |                 |    |    |
|                    |                                                                                                                                                                                                                                                              |                 |          |             |     |     |          | -24             | -78 | 12  |                 |    |    |
|                    |                                                                                                                                                                                                                                                              |                 |          |             |     |     |          | -30             | -24 | -9  |                 |    |    |
|                    |                                                                                                                                                                                                                                                              |                 |          |             |     |     |          | 30              | -54 | 57  |                 |    |    |
|                    |                                                                                                                                                                                                                                                              |                 |          |             |     |     |          | 33              | -33 | 36  |                 |    |    |
|                    |                                                                                                                                                                                                                                                              |                 |          |             |     |     |          | -30             | -45 | 57  |                 |    |    |
|                    |                                                                                                                                                                                                                                                              |                 |          |             |     |     |          | 45              | -12 | -18 |                 |    |    |
|                    |                                                                                                                                                                                                                                                              |                 |          |             |     |     |          | -21             | -3  | -18 |                 |    |    |
|                    |                                                                                                                                                                                                                                                              |                 |          |             |     |     |          | ADHD > Controls |     |     | ADHD < Controls |    |    |
|                    |                                                                                                                                                                                                                                                              |                 |          |             |     |     |          |                 |     |     | 0               | 15 | 54 |
|                    |                                                                                                                                                                                                                                                              |                 |          |             |     |     |          |                 |     |     | 24              | -9 | 48 |
|                    |                                                                                                                                                                                                                                                              |                 |          |             |     |     |          |                 |     |     | 45              | 3  | 45 |
|                    |                                                                                                                                                                                                                                                              |                 |          |             |     |     | -21      | 30              | -12 |     |                 |    |    |
|                    |                                                                                                                                                                                                                                                              |                 |          |             |     |     | 42       | 27              | 15  |     |                 |    |    |
|                    |                                                                                                                                                                                                                                                              |                 |          |             |     |     | 21       | 51              | 9   |     |                 |    |    |
|                    |                                                                                                                                                                                                                                                              |                 |          |             |     |     | 9        | 42              | 6   |     |                 |    |    |
|                    |                                                                                                                                                                                                                                                              |                 |          |             |     |     | 45       | -6              | 24  |     |                 |    |    |
|                    |                                                                                                                                                                                                                                                              |                 |          |             |     |     | -36      | 9               | 21  |     |                 |    |    |
|                    |                                                                                                                                                                                                                                                              |                 |          |             |     |     | 6        | 12              | 3   |     |                 |    |    |
|                    |                                                                                                                                                                                                                                                              |                 |          |             |     |     | 12       | -9              | 18  |     |                 |    |    |
|                    |                                                                                                                                                                                                                                                              |                 |          |             |     |     | -12      | -3              | 18  |     |                 |    |    |
|                    |                                                                                                                                                                                                                                                              |                 |          |             |     |     | -9       | -33             | -6  |     |                 |    |    |
|                    |                                                                                                                                                                                                                                                              |                 |          |             |     |     | 30       | -3              | -15 |     |                 |    |    |
|                    |                                                                                                                                                                                                                                                              |                 |          |             |     |     | -3       | -72             | 3   |     |                 |    |    |
|                    |                                                                                                                                                                                                                                                              |                 |          |             |     |     | 27       | -63             | -21 |     |                 |    |    |
|                    |                                                                                                                                                                                                                                                              |                 |          |             |     |     | 3        | -24             | 3   |     |                 |    |    |
|                    |                                                                                                                                                                                                                                                              |                 |          | ADHD        |     |     | Controls |                 |     |     |                 |    |    |

(Continued)

Table S1: *Continued*

| Study                | Task                                                                                                                                                  | No. of subjects |          | Coordinates |     |          |                 |     |     |                 |  |  |
|----------------------|-------------------------------------------------------------------------------------------------------------------------------------------------------|-----------------|----------|-------------|-----|----------|-----------------|-----|-----|-----------------|--|--|
|                      |                                                                                                                                                       | ADHD            | Controls | ADHD        |     |          | Controls        |     |     |                 |  |  |
| Durston et al., 2003 | Standard Go/No-Go paradigm using popular children cartoon characters as target stimuli to which subjects were instructed to respond via button-press. | 7               | 7        | 21          | -46 | -6       | 21              | -46 | -6  |                 |  |  |
|                      |                                                                                                                                                       |                 |          | -21         | -47 | -5       | -21             | -47 | -5  |                 |  |  |
|                      |                                                                                                                                                       |                 |          | 54          | -34 | 26       | 54              | -34 | 26  |                 |  |  |
|                      |                                                                                                                                                       |                 |          | 8           | -52 | 37       | 8               | -52 | 37  |                 |  |  |
|                      |                                                                                                                                                       |                 |          | -9          | -49 | 37       | -9              | -49 | 37  |                 |  |  |
|                      |                                                                                                                                                       |                 |          | 18          | 52  | 24       | 62              | -27 | 27  |                 |  |  |
|                      |                                                                                                                                                       |                 |          | 19          | -37 | 32       | 33              | 33  | 41  |                 |  |  |
|                      |                                                                                                                                                       |                 |          | -17         | -46 | 37       | 9               | 29  | -8  |                 |  |  |
|                      |                                                                                                                                                       |                 |          | 48          | -47 | 25       | -44             | 22  | 41  |                 |  |  |
|                      |                                                                                                                                                       |                 |          | 18          | -84 | -7       | -16             | 6   | 16  |                 |  |  |
|                      |                                                                                                                                                       |                 |          | -13         | 84  | 8        | 26              | -4  | -12 |                 |  |  |
|                      |                                                                                                                                                       |                 |          | 12          | -43 | 49       | -3              | 3   | 26  |                 |  |  |
|                      |                                                                                                                                                       |                 |          | -12         | -31 | 45       |                 |     |     |                 |  |  |
|                      |                                                                                                                                                       |                 |          |             |     |          | ADHD > Controls |     |     | ADHD < Controls |  |  |
|                      |                                                                                                                                                       |                 |          | 12          | 59  | 24       | -10             | 29  | -8  |                 |  |  |
|                      |                                                                                                                                                       |                 |          | -20         | 86  | 4        |                 |     |     |                 |  |  |
|                      |                                                                                                                                                       |                 |          | 15          | 90  | -2       |                 |     |     |                 |  |  |
|                      |                                                                                                                                                       |                 |          | 28          | -44 | 24       |                 |     |     |                 |  |  |
|                      |                                                                                                                                                       |                 |          | 5           | -57 | 53       |                 |     |     |                 |  |  |
|                      |                                                                                                                                                       |                 |          | -4          | -59 | 53       |                 |     |     |                 |  |  |
| 39                   | -35                                                                                                                                                   | 0               |          |             |     |          |                 |     |     |                 |  |  |
| 42                   | 30                                                                                                                                                    | 25              |          |             |     |          |                 |     |     |                 |  |  |
| 19                   | -45                                                                                                                                                   | 29              |          |             |     |          |                 |     |     |                 |  |  |
| -8                   | -51                                                                                                                                                   | 26              |          |             |     |          |                 |     |     |                 |  |  |
| 55                   | 17                                                                                                                                                    | 24              |          |             |     |          |                 |     |     |                 |  |  |
|                      |                                                                                                                                                       |                 | ADHD     |             |     | Controls |                 |     |     |                 |  |  |
| Durston et al., 2006 | Standard Go/No-Go paradigm using popular children cartoon characters as target stimuli to which subjects were instructed to respond via button-press. | 11              | 11       | 49          | 16  | 45       | 42              | 24  | -14 |                 |  |  |
|                      |                                                                                                                                                       |                 |          | 43          | -44 | 50       | -37             | 23  | -13 |                 |  |  |
|                      |                                                                                                                                                       |                 |          |             |     |          | 5               | 43  | 18  |                 |  |  |
|                      |                                                                                                                                                       |                 |          |             |     |          | -8              | 42  | 27  |                 |  |  |
|                      |                                                                                                                                                       |                 |          |             |     |          | -37             | 45  | 13  |                 |  |  |
|                      |                                                                                                                                                       |                 |          |             |     |          | 45              | 12  | 37  |                 |  |  |
|                      |                                                                                                                                                       |                 |          |             |     |          | -45             | 4   | 56  |                 |  |  |
|                      |                                                                                                                                                       |                 |          |             |     |          | 29              | 57  | 9   |                 |  |  |
|                      |                                                                                                                                                       |                 |          |             |     |          | -61             | -51 | 29  |                 |  |  |
|                      |                                                                                                                                                       |                 |          |             |     |          | ADHD > Controls |     |     | ADHD < Controls |  |  |
|                      |                                                                                                                                                       |                 | -37      | 23          | -13 |          |                 |     |     |                 |  |  |
|                      |                                                                                                                                                       |                 | -8       | 42          | 27  |          |                 |     |     |                 |  |  |
|                      |                                                                                                                                                       |                 | -45      | 4           | 56  |          |                 |     |     |                 |  |  |

(Continued)

Table S1: Continued

| Study                | Task                                                                                                                                           | No. of subjects |          | Coordinates |     |     |                 |     |     |                 |     |    |
|----------------------|------------------------------------------------------------------------------------------------------------------------------------------------|-----------------|----------|-------------|-----|-----|-----------------|-----|-----|-----------------|-----|----|
|                      |                                                                                                                                                | ADHD            | Controls | ADHD        |     |     | Controls        |     |     |                 |     |    |
|                      |                                                                                                                                                |                 |          |             |     |     | 29              | 57  | 9   |                 |     |    |
|                      |                                                                                                                                                |                 |          |             |     |     | -61             | -51 | 29  |                 |     |    |
|                      |                                                                                                                                                |                 |          |             |     |     | ADHD > Controls |     |     | ADHD < Controls |     |    |
| Hart et al., 2014    | Subjects respond to right/left arrows with right/left thumb button press. Withheld responses for stop signs.                                   | 30              | 30       | -26         | -67 | -13 | 29              | 30  | -18 |                 |     |    |
|                      |                                                                                                                                                |                 |          |             |     |     | -37             | 30  | -14 |                 |     |    |
|                      |                                                                                                                                                |                 |          |             |     |     | -3              | 18  | -24 |                 |     |    |
|                      |                                                                                                                                                |                 |          |             |     |     | -46             | -40 | 2   |                 |     |    |
|                      |                                                                                                                                                |                 |          |             |     |     | 38              | -58 | -21 |                 |     |    |
|                      |                                                                                                                                                |                 |          |             |     |     | -51             | -46 | 26  |                 |     |    |
|                      |                                                                                                                                                |                 |          |             |     |     | -7              | -79 | 43  |                 |     |    |
|                      |                                                                                                                                                |                 |          |             |     |     | 21              | -62 | 26  |                 |     |    |
|                      |                                                                                                                                                |                 |          |             |     |     | ADHD            |     |     | Controls        |     |    |
| Janssen et al., 2015 | Subjects responded to pictures of airplanes with a button press and withheld their responses if pictures were superimposed with a white cross. | 21              | 17       | 33          | 39  | 31  | 50              | 19  | -1  |                 |     |    |
|                      |                                                                                                                                                |                 |          |             |     |     | -32             | 19  | 4   | -35             | 10  | 3  |
|                      |                                                                                                                                                |                 |          |             |     |     | 5               | 18  | 36  | 6               | 36  | 16 |
|                      |                                                                                                                                                |                 |          |             |     |     |                 |     |     | 21              | 56  | 30 |
|                      |                                                                                                                                                |                 |          |             |     |     | ADHD > Controls |     |     | ADHD < Controls |     |    |
| Ma et al., 2012      | Subjects instructed to button press for any letter of the alphabet except for the letter 'V'.                                                  | 15              | 15       | 44          | -64 | -8  |                 |     |     |                 |     |    |
|                      |                                                                                                                                                |                 |          |             |     |     | 4               | -12 | -14 |                 |     |    |
|                      |                                                                                                                                                |                 |          |             |     |     | 34              | 0   | 28  |                 |     |    |
|                      |                                                                                                                                                |                 |          |             |     |     | 32              | -60 | 12  |                 |     |    |
|                      |                                                                                                                                                |                 |          |             |     |     | 32              | -74 | -2  |                 |     |    |
|                      |                                                                                                                                                |                 |          |             |     |     | -32             | -76 | 12  |                 |     |    |
|                      |                                                                                                                                                |                 |          |             |     |     | 4               | -40 | -22 |                 |     |    |
|                      |                                                                                                                                                |                 |          |             |     |     | 2               | -80 | -30 |                 |     |    |
|                      |                                                                                                                                                |                 |          |             |     |     | -54             | -4  | 16  |                 |     |    |
|                      |                                                                                                                                                |                 |          |             |     |     | -48             | -34 | 18  |                 |     |    |
|                      |                                                                                                                                                |                 |          |             |     |     | 32              | -28 | -8  |                 |     |    |
|                      |                                                                                                                                                |                 |          |             |     |     | 28              | -90 | 14  |                 |     |    |
|                      |                                                                                                                                                |                 |          |             |     |     | -40             | -84 | -12 |                 |     |    |
|                      |                                                                                                                                                |                 |          |             |     |     | ADHD            |     |     | Controls        |     |    |
| Pliszka et al., 2006 | Subjects were instructed to left thumb press for "A" and right thumb press for "B". Subjects asked to with-hold a response for "S"             | 16              | 15       | 41          | 15  | 7   | 41              | 5   | 29  |                 |     |    |
|                      |                                                                                                                                                |                 |          |             |     |     | 48              | -54 | 11  | 55              | -46 | 11 |
|                      |                                                                                                                                                |                 |          |             |     |     | 24              | -86 | 19  | 2               | 24  | 32 |
|                      |                                                                                                                                                |                 |          |             |     |     | -41             | -74 | -3  | 40              | 21  | 0  |
|                      |                                                                                                                                                |                 |          |             |     |     | 30              | -54 | 44  | -44             | 24  | -4 |
|                      |                                                                                                                                                |                 |          |             |     |     | 44              | 4   | 28  | 37              | -45 | 40 |
|                      |                                                                                                                                                |                 |          |             |     |     | -36             | -3  | 37  | -43             | 4   | 39 |
|                      |                                                                                                                                                |                 |          |             |     |     | 39              | 15  | 10  | 43              | 7   | 37 |

(Continued)

Table S1: *Continued*

| Study               | Task                                                                                                                   | No. of subjects |          | Coordinates |     |     |                 |     |                 |     |
|---------------------|------------------------------------------------------------------------------------------------------------------------|-----------------|----------|-------------|-----|-----|-----------------|-----|-----------------|-----|
|                     |                                                                                                                        | ADHD            | Controls | ADHD        |     |     | Controls        |     |                 |     |
|                     |                                                                                                                        |                 |          | -35         | 21  | -3  |                 |     |                 |     |
|                     |                                                                                                                        |                 |          | 3           | 20  | 34  |                 |     |                 |     |
|                     |                                                                                                                        |                 |          | -44         | -74 | -6  |                 |     |                 |     |
|                     |                                                                                                                        |                 |          | -29         | -55 | 40  |                 |     |                 |     |
|                     |                                                                                                                        |                 |          |             |     |     | ADHD            |     | Controls        |     |
| Rubia et al., 2005  | Subjects respond to right/left arrows with right/left thumb button press. Withheld responses for up arrows             | 16              | 21       | 17          | 25  | 36  | 40              | 20  | -13             |     |
|                     |                                                                                                                        |                 |          | 50          | -4  | 1   | -42             | 15  | -7              |     |
|                     |                                                                                                                        |                 |          | -41         | -64 | 16  | -27             | 59  | -9              |     |
|                     |                                                                                                                        |                 |          | -13         | -38 | 49  | 35              | 52  | 5               |     |
|                     |                                                                                                                        |                 |          |             |     |     |                 | -22 | 13              | 43  |
|                     |                                                                                                                        |                 |          |             |     |     |                 | 38  | 12              | 40  |
|                     |                                                                                                                        |                 |          |             |     |     |                 | 43  | 0               | 9   |
|                     |                                                                                                                        |                 |          |             |     |     |                 | 47  | -51             | 35  |
|                     |                                                                                                                        |                 |          |             |     |     |                 | -27 | -32             | 53  |
|                     |                                                                                                                        |                 |          |             |     |     |                 | 36  | -52             | 30  |
|                     |                                                                                                                        |                 |          |             |     |     |                 | 8   | 15              | 0   |
|                     |                                                                                                                        |                 |          |             |     |     |                 | -4  | -20             | -23 |
|                     |                                                                                                                        |                 |          |             |     |     |                 | 0   | 50              | 30  |
|                     |                                                                                                                        |                 |          |             |     |     |                 | 54  | -25             | -16 |
|                     |                                                                                                                        |                 |          |             |     |     |                 | -58 | -22             | -11 |
|                     |                                                                                                                        |                 |          |             |     |     |                 | 47  | -14             | 0   |
|                     |                                                                                                                        |                 |          |             |     |     |                 | 2   | -58             | 19  |
|                     |                                                                                                                        |                 |          |             |     |     | ADHD > Controls |     | ADHD < Controls |     |
|                     |                                                                                                                        |                 |          |             |     |     |                 | 42  | 23              | -13 |
|                     |                                                                                                                        |                 |          |             |     |     |                 | 42  | 23              | -20 |
|                     |                                                                                                                        |                 |          |             |     |     |                 | 62  | 3               | -8  |
|                     |                                                                                                                        |                 |          |             |     |     |                 | 4   | -58             | 24  |
|                     |                                                                                                                        |                 |          |             |     |     |                 | 4   | -66             | 26  |
|                     |                                                                                                                        |                 |          |             |     |     |                 | 4   | -42             | 13  |
|                     |                                                                                                                        |                 |          |             |     |     | ADHD            |     | Controls        |     |
| Schulz et al., 2004 | Subjects were instructed to button press for letters between "A" to "F" and to withhold a response for the letter "X". | 10              | 9        | 46          | 26  | -23 | 47              | 10  | 7               |     |
|                     |                                                                                                                        |                 |          | -35         | 29  | -21 | -54             | -14 | 8               |     |
|                     |                                                                                                                        |                 |          | 31          | 52  | 16  | 31              | -73 | -15             |     |
|                     |                                                                                                                        |                 |          | 37          | 19  | 27  | 33              | -50 | -24             |     |
|                     |                                                                                                                        |                 |          | 31          | -68 | 30  | -30             | -50 | -27             |     |
|                     |                                                                                                                        |                 |          | -15         | -64 | 25  |                 |     |                 |     |
|                     |                                                                                                                        |                 |          |             |     |     | ADHD > Controls |     | ADHD < Controls |     |
|                     |                                                                                                                        |                 |          | 29          | 54  | 15  | -39             | -18 | 38              |     |
|                     |                                                                                                                        |                 |          | -22         | 64  | 6   | 50              | 2   | -36             |     |

(Continued)

Table S1: *Continued*

| Study                                    | Task                                                                                                                          | No. of subjects |          | Coordinates |     |     |                 |     |     |
|------------------------------------------|-------------------------------------------------------------------------------------------------------------------------------|-----------------|----------|-------------|-----|-----|-----------------|-----|-----|
|                                          |                                                                                                                               | ADHD            | Controls | ADHD        |     |     | Controls        |     |     |
|                                          |                                                                                                                               |                 |          | 37          | 16  | 30  | -36             | -16 | -23 |
|                                          |                                                                                                                               |                 |          | 36          | 28  | -25 | 16              | -49 | 7   |
|                                          |                                                                                                                               |                 |          | -32         | 30  | -25 | 4               | -53 | -22 |
|                                          |                                                                                                                               |                 |          | -6          | -50 | -8  | -19             | -61 | -17 |
|                                          |                                                                                                                               |                 |          | -1          | 36  | 24  |                 |     |     |
|                                          |                                                                                                                               |                 |          | 50          | -44 | 33  |                 |     |     |
|                                          |                                                                                                                               |                 |          | -35         | -33 | 28  |                 |     |     |
|                                          |                                                                                                                               |                 |          | 16          | -68 | 24  |                 |     |     |
|                                          |                                                                                                                               |                 |          |             |     |     | ADHD            |     |     |
|                                          |                                                                                                                               |                 |          |             |     |     | Controls        |     |     |
| Spinelli et al., 2011                    | Subjects were instructed to button press when presented with a green spaceship and to withhold a response for a red spaceship | 13              | 17       | -14         | -72 | -26 | 42              | -82 | 28  |
|                                          |                                                                                                                               |                 |          | -28         | -66 | -38 | 44              | -70 | 34  |
|                                          |                                                                                                                               |                 |          | -16         | -48 | -26 | 44              | -62 | 26  |
|                                          |                                                                                                                               |                 |          | 20          | 46  | 28  | 20              | -6  | -28 |
|                                          |                                                                                                                               |                 |          | 20          | 44  | 18  | 36              | -16 | -22 |
|                                          |                                                                                                                               |                 |          | -22         | 6   | 28  | 28              | -10 | -24 |
|                                          |                                                                                                                               |                 |          | -24         | 14  | 18  | 22              | 30  | 36  |
|                                          |                                                                                                                               |                 |          | -26         | -4  | 8   | 22              | 24  | 42  |
|                                          |                                                                                                                               |                 |          | -12         | 18  | 10  | 14              | 30  | 48  |
|                                          |                                                                                                                               |                 |          | -12         | 12  | 18  | -2              | -62 | 22  |
|                                          |                                                                                                                               |                 |          | -12         | 0   | 24  | 18              | -56 | 6   |
|                                          |                                                                                                                               |                 |          |             |     |     | ADHD > Controls |     |     |
|                                          |                                                                                                                               |                 |          |             |     |     | ADHD < Controls |     |     |
|                                          |                                                                                                                               |                 |          | 22          | 48  | 28  |                 |     |     |
|                                          |                                                                                                                               |                 |          | 20          | 44  | 20  |                 |     |     |
|                                          |                                                                                                                               |                 |          | 24          | 50  | 2   |                 |     |     |
|                                          |                                                                                                                               |                 |          | -18         | -64 | -30 |                 |     |     |
|                                          |                                                                                                                               |                 |          | -18         | -54 | -28 |                 |     |     |
|                                          |                                                                                                                               |                 |          | -22         | -58 | -38 |                 |     |     |
|                                          |                                                                                                                               |                 |          | -50         | 30  | -2  |                 |     |     |
|                                          |                                                                                                                               |                 |          | -46         | 36  | -14 |                 |     |     |
|                                          |                                                                                                                               |                 |          | -54         | 36  | -10 |                 |     |     |
|                                          |                                                                                                                               |                 |          |             |     |     | ADHD            |     |     |
|                                          |                                                                                                                               |                 |          |             |     |     | Controls        |     |     |
| Suskauer, Simmonds, Fotedar et al., 2008 | Subjects were instructed to button press when presented with a green spaceship and to withhold a response for a red spaceship | 25              | 25       | 6           | 10  | 49  | -37             | -73 | -13 |
|                                          |                                                                                                                               |                 |          |             |     |     | 2               | 16  | 47  |
|                                          |                                                                                                                               |                 |          |             |     |     | 45              | -79 | -4  |
|                                          |                                                                                                                               |                 |          |             |     |     | 39              | 44  | 25  |
|                                          |                                                                                                                               |                 |          |             |     |     | 49              | -39 | 13  |
|                                          |                                                                                                                               |                 |          |             |     |     | 6               | -62 | -17 |
|                                          |                                                                                                                               |                 |          |             |     |     | 25              | 14  | -7  |
|                                          |                                                                                                                               |                 |          |             |     |     | ADHD > Controls |     |     |
|                                          |                                                                                                                               |                 |          |             |     |     | ADHD < Controls |     |     |

*(Continued)*

Table S1: *Continued*

| Study                  | Task                                                                                                                                                                                                                           | No. of subjects |          | Coordinates     |     |     |                 |     |     |          |  |  |
|------------------------|--------------------------------------------------------------------------------------------------------------------------------------------------------------------------------------------------------------------------------|-----------------|----------|-----------------|-----|-----|-----------------|-----|-----|----------|--|--|
|                        |                                                                                                                                                                                                                                | ADHD            | Controls | ADHD            |     |     | Controls        |     |     |          |  |  |
|                        |                                                                                                                                                                                                                                |                 |          | 6               | -37 | 76  | 61              | -37 | 13  |          |  |  |
|                        |                                                                                                                                                                                                                                |                 |          |                 |     |     | -11             | -55 | -41 |          |  |  |
|                        |                                                                                                                                                                                                                                |                 |          |                 |     |     | -27             | -60 | -12 |          |  |  |
|                        |                                                                                                                                                                                                                                |                 |          |                 |     |     | -24             | -25 | 62  |          |  |  |
|                        |                                                                                                                                                                                                                                |                 |          |                 |     |     | 30              | -62 | -12 |          |  |  |
|                        |                                                                                                                                                                                                                                |                 |          |                 |     |     | -1              | 11  | 56  |          |  |  |
|                        |                                                                                                                                                                                                                                |                 |          |                 |     |     | -24             | -35 | -32 |          |  |  |
|                        |                                                                                                                                                                                                                                |                 |          |                 |     |     | 10              | 16  | 43  |          |  |  |
|                        |                                                                                                                                                                                                                                |                 |          |                 |     |     | 52              | -39 | 16  |          |  |  |
|                        |                                                                                                                                                                                                                                |                 |          |                 |     |     | -5              | -40 | 19  |          |  |  |
|                        |                                                                                                                                                                                                                                |                 |          |                 |     |     | -32             | -22 | 56  |          |  |  |
|                        |                                                                                                                                                                                                                                |                 |          |                 |     |     | -25             | 0   | 17  |          |  |  |
|                        |                                                                                                                                                                                                                                |                 |          |                 |     |     | -17             | -51 | 20  |          |  |  |
|                        |                                                                                                                                                                                                                                |                 |          |                 |     |     | ADHD            |     |     | Controls |  |  |
| Tamm et al., 2004      | Subjects were asked to keypress for every letter except "A" which occurred in 17% of trials                                                                                                                                    | 10              | 12       | -54             | -29 | -19 | 41              | -71 | 53  |          |  |  |
|                        |                                                                                                                                                                                                                                |                 |          | 70              | -24 | -13 | 5               | 40  | 42  |          |  |  |
|                        |                                                                                                                                                                                                                                |                 |          | -42             | 16  | 13  | 46              | 24  | -14 |          |  |  |
|                        |                                                                                                                                                                                                                                |                 |          | 34              | 31  | -13 |                 |     |     |          |  |  |
|                        |                                                                                                                                                                                                                                |                 |          | -4              | 48  | 12  |                 |     |     |          |  |  |
|                        |                                                                                                                                                                                                                                |                 |          | ADHD > Controls |     |     | ADHD < Controls |     |     |          |  |  |
|                        |                                                                                                                                                                                                                                |                 |          | -56             | -33 | -19 | 10              | 6   | 43  |          |  |  |
|                        |                                                                                                                                                                                                                                |                 |          | ADHD            |     |     | Controls        |     |     |          |  |  |
| Vaidya et al., 2005    | Subjects were asked to left/right button press based of left/right direction of central arrow with flanking stimuli. Subjects were asked to withhold a response for the letter "X"                                             | 10              | 10       | 32              | 20  | -7  | 35              | -5  | 33  |          |  |  |
|                        |                                                                                                                                                                                                                                |                 |          | 55              | -47 | 7   | 46              | 10  | 28  |          |  |  |
|                        |                                                                                                                                                                                                                                |                 |          |                 |     |     | -6              | 25  | -5  |          |  |  |
|                        |                                                                                                                                                                                                                                |                 |          |                 |     |     | 7               | 15  | -8  |          |  |  |
|                        |                                                                                                                                                                                                                                |                 |          | ADHD > Controls |     |     | ADHD < Controls |     |     |          |  |  |
| Van Rooij et al., 2015 | Subjects were asked to press right and left buttons corresponding to the direction of a picture of an aircraft, and to withhold their button press if there was a visual stop sign superimposed on the picture of the aircraft | 185             | 235      |                 |     |     | -38             | 20  | -18 |          |  |  |
|                        |                                                                                                                                                                                                                                |                 |          |                 |     |     | -2              | 60  | 38  |          |  |  |
|                        |                                                                                                                                                                                                                                |                 |          | ADHD            |     |     | Controls        |     |     |          |  |  |
| Wang et al., 2013      | Subjects were asked to button press when the number "1" was followed by the number "9". Subjects were asked to withhold a response if "1" was followed by a number other than "9".                                             | 28              | 31       | 6               | 23  | 47  | -13             | 19  | 34  |          |  |  |
|                        |                                                                                                                                                                                                                                |                 |          | 41              | 30  | -9  | 0               | -56 | 36  |          |  |  |
|                        |                                                                                                                                                                                                                                |                 |          | -47             | 11  | 28  |                 |     |     |          |  |  |
|                        |                                                                                                                                                                                                                                |                 |          | -27             | -56 | 42  |                 |     |     |          |  |  |
|                        |                                                                                                                                                                                                                                |                 |          | 23              | -50 | 44  |                 |     |     |          |  |  |
|                        |                                                                                                                                                                                                                                |                 |          | 6               | -79 | -24 |                 |     |     |          |  |  |

*(Continued)*

Table S1: *Continued*

| Study | Task | No. of subjects |          | Coordinates     |     |     |                 |     |     |  |  |
|-------|------|-----------------|----------|-----------------|-----|-----|-----------------|-----|-----|--|--|
|       |      | ADHD            | Controls | ADHD            |     |     | Controls        |     |     |  |  |
|       |      |                 |          | -47             | 10  | 31  |                 |     |     |  |  |
|       |      |                 |          | -60             | -32 | -2  |                 |     |     |  |  |
|       |      |                 |          | -42             | -66 | 45  |                 |     |     |  |  |
|       |      |                 |          | 47              | -60 | 45  |                 |     |     |  |  |
|       |      |                 |          | -7              | -53 | 44  |                 |     |     |  |  |
|       |      |                 |          | ADHD > Controls |     |     | ADHD < Controls |     |     |  |  |
|       |      |                 |          | -52             | 22  | 30  | -4              | 8   | 26  |  |  |
|       |      |                 |          | -44             | -62 | -2  | 33              | -12 | 38  |  |  |
|       |      |                 |          | -45             | -80 | -13 | -56             | -25 | -10 |  |  |
|       |      |                 |          | -22             | 12  | -4  | -31             | -7  | -22 |  |  |
|       |      |                 |          | -10             | -47 | 8   | 31              | -26 | -21 |  |  |
|       |      |                 |          | -12             | -71 | 56  | 25              | -4  | -22 |  |  |
|       |      |                 |          | 12              | -53 | -12 |                 |     |     |  |  |
|       |      |                 |          | -19             | 22  | 22  |                 |     |     |  |  |
|       |      |                 |          | -44             | -59 | 2   |                 |     |     |  |  |
|       |      |                 |          | 20              | -47 | 48  |                 |     |     |  |  |
|       |      |                 |          | -28             | -26 | 30  |                 |     |     |  |  |
|       |      |                 |          | 17              | -78 | -24 |                 |     |     |  |  |
